# Supplementary material
Source: PubMed Central journal article supplement (PMC2875802)
Supplement: me.2010-0068_1.pdf [file me.2010-0068_1.pdf]

**Figure S1.** Sequence information of the shuttle vector at the region of translation initiation site, the FLAG tag, the Myc tag, and the multiple cloning site.

**Figure S1**

```

5'----- ACCTTTCTATACGAAGTTGTGGATCTGCGATCTAAGTAAGCCGCGG
                                     SacII
ccgcc ATG GAC TAC AAG GAT GAC GAT GAC AAG GCA GCT GAG CAG AAA
                                     FLAG                               Myc
CTC ATC TCT GAA GAG GAT CTG ACTAGT GTC GAC TCT AGT GCG GCC
                                     SpeI           Sall                               NotI
GCA ACG CGT CTC GAG GAT ATC GGATCC -----3'
      MluI           XhoI           EcoRV           BamHI
  
```
